# Supplementary material for: Impaired Pharmacokinetics of Amiodarone under Veno-Venous Extracorporeal Membrane Oxygenation: From Bench to Bedside
Source: MDPI journal article supplement (doi:10.3390/pharmaceutics14050974), 2022-04-30

Supplemental data:

Figure S1: Diagnostic plots of final model

- A. Observed concentrations vs predicted concentrations of populations
- B. Observed concentrations vs individual predicted concentrations
- C. Individual weighted residues (IWRES) in time
- D. Individual weighted residues (IWRES) vs observed concentrations ( $C_c$ )

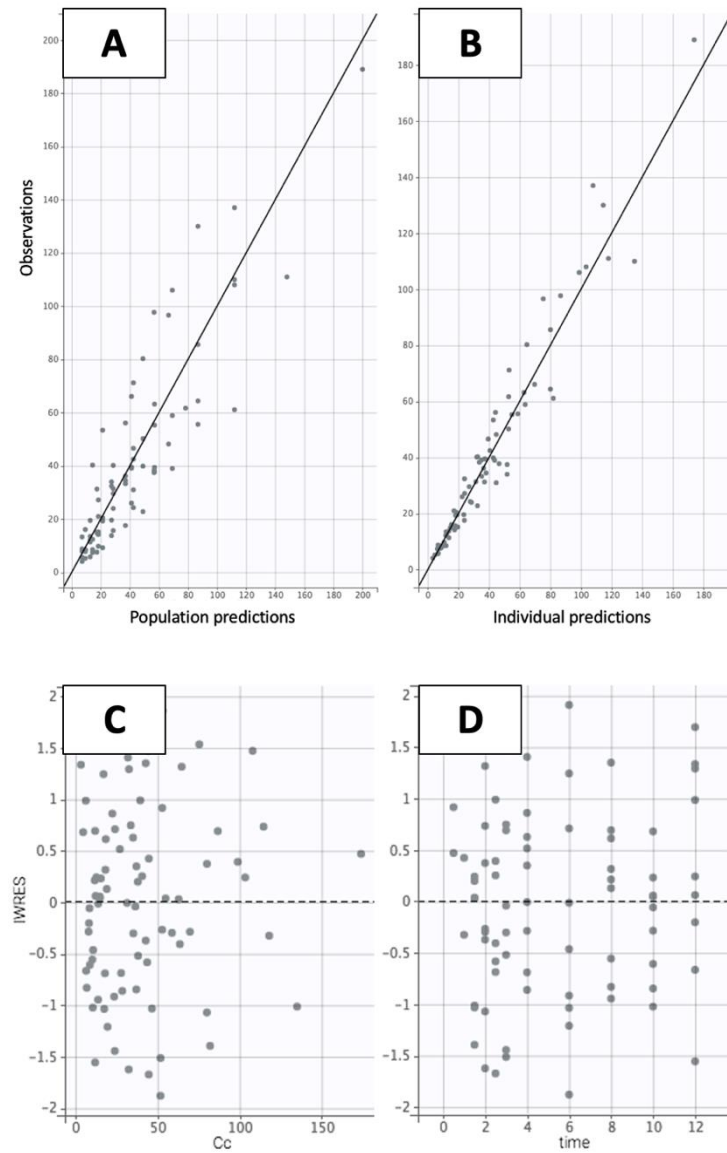

Supplement: s1 [file s1]
